# Supplementary material
Source: PubMed Central journal article supplement (PMC10516178)
Supplement: NIHMS1925757-supplement-Morale_et_al_2021_Supplement_1_pdf.pdf [file NIHMS1925757-supplement-Morale_et_al_2021_Supplement_1_pdf.pdf]

eSupplement 1. Summary of participant demographics

| Factor                 | Children | Adults |
|------------------------|----------|--------|
| Number                 | 235      | 38     |
| Mean age, years        | 9.6+1.7  | 27+5.0 |
| Female/male            | 113/122  | 23/15  |
| Race/ethnicity         |          |        |
| African American/Black | 20       | 2      |
| Asian                  | 17       | 16     |
| Hispanic               | 34       | 7      |
| Non-Hispanic white     | 144      | 13     |
| More than one race     | 20       | 0      |
